# Supplementary material for: Bioinformatics Analysis Reveals the Altered Gene Expression of Patients with Postmenopausal Osteoporosis Using Liuweidihuang Pills Treatment
Source: Hindawi journal article supplement (doi:10.1155/2019/1907906), 2019-01-27
Supplement: f1 [file 1907906.f1.pdf]

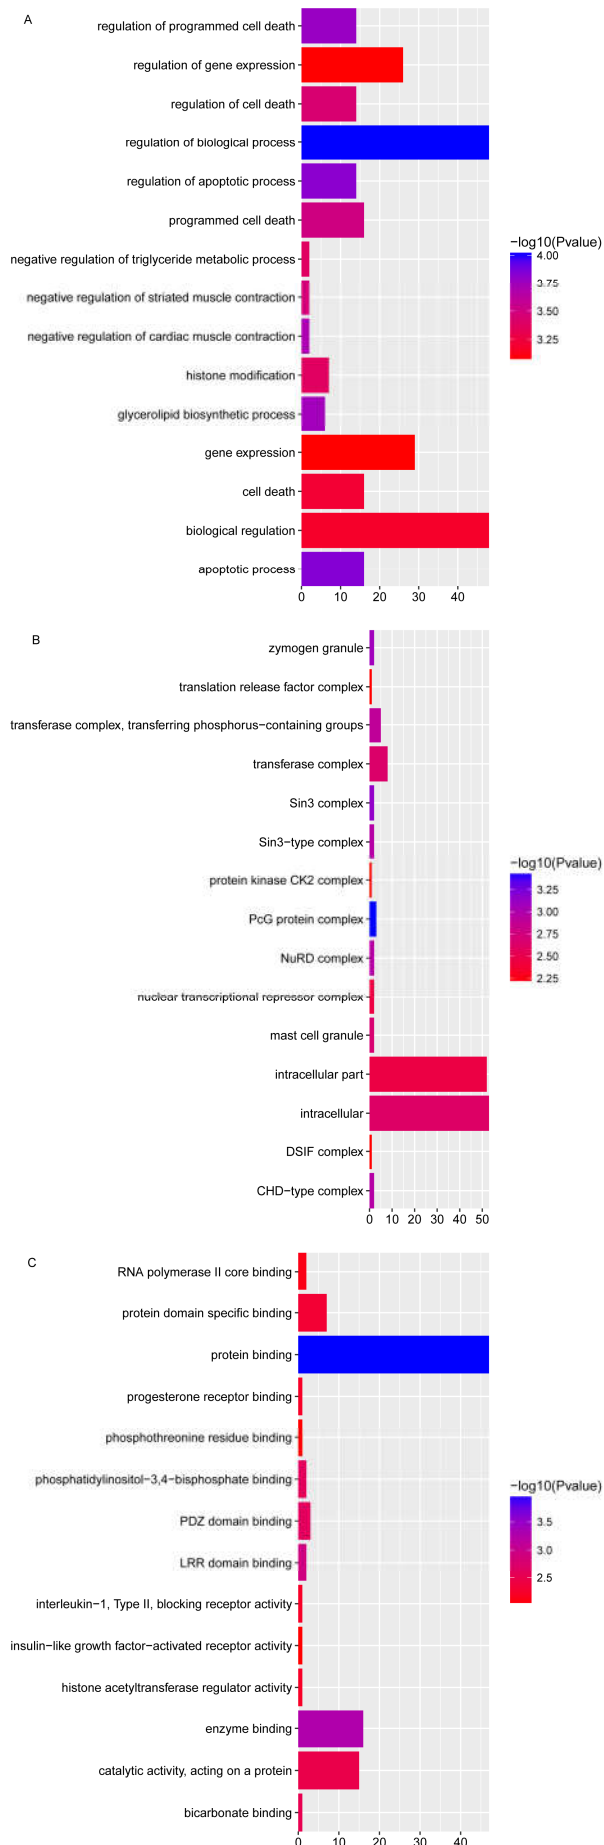

Supplementary Table 1 The primers of selected mRNAs

| Primer name                  | Sequence of primer(5'to3') | Size of production (bp) |
|------------------------------|----------------------------|-------------------------|
| GAPDH-F (endogenous control) | GGAGCGAGATCCCTCCAAAAT      | 197                     |
| GAPDH-R (endogenous control) | GGCTGTTGTCATACTTCTCATGG    |                         |
| ATF, 2-F                     | TTTGACCCAGCAACATCCTCC      | 168                     |
| ATF2-R                       | TGGGTCTGTGGAGTTGTGTGA      |                         |
| FBXW7-F                      | GTCCCGAGAAGCGGTTTGATA      | 100                     |
| FBXW7-R                      | TGCTCAGGCACGTCAGAAAAG      |                         |
| RBBP4-F                      | TCAGTTTGATGCGTCACACTAC     | 150                     |
| RBBP4-R                      | GCGATGATACAAGGGTTCTGG      |                         |
| RDX-F                        | GCCCAAGCCAGAGATGAAACC      | 166                     |
| RDX-R                        | ATGCATACAGTTTGGGTCCCC      |                         |

Supplementary table 2 The clinical features of the enrolled subjects

| GSE7429       |                  |                          |                          |
|---------------|------------------|--------------------------|--------------------------|
| GEO accession | Sample title     | Sample characteristics 1 | Sample characteristics 2 |
| GSM179758     | Bcell-highBMD-1  | postmenopause, age=57    | -                        |
| GSM179759     | Bcell-highBMD-2  | postmenopause, age=57    | -                        |
| GSM179760     | Bcell-highBMD-3  | postmenopause, age=60    | -                        |
| GSM179761     | Bcell-highBMD-4  | postmenopause, age=58    | -                        |
| GSM179762     | Bcell-highBMD-5  | postmenopause, age=54    | -                        |
| GSM179763     | Bcell-highBMD-6  | postmenopause, age=54    | -                        |
| GSM179764     | Bcell-highBMD-7  | postmenopause, age=58    | -                        |
| GSM179765     | Bcell-highBMD-8  | postmenopause, age=58    | -                        |
| GSM179766     | Bcell-highBMD-9  | postmenopause, age=55    | -                        |
| GSM179767     | Bcell-highBMD-10 | postmenopause, age=58    | -                        |
| GSM179768     | Bcell-lowBMD-1   | postmenopause, age=58    | -                        |
| GSM179769     | Bcell-lowBMD-2   | postmenopause, age=56    | -                        |
| GSM179770     | Bcell-lowBMD-3   | postmenopause, age=58    | -                        |
| GSM179771     | Bcell-lowBMD-4   | postmenopause, age=59    | -                        |
| GSM179772     | Bcell-lowBMD-5   | postmenopause, age=58    | -                        |
| GSM179773     | Bcell-lowBMD-6   | postmenopause, age=60    | -                        |
| GSM179774     | Bcell-lowBMD-7   | postmenopause, age=59    | -                        |
| GSM179775     | Bcell-lowBMD-8   | postmenopause, age=56    | -                        |
| GSM179776     | Bcell-lowBMD-9   | postmenopause, age=59    | -                        |
| GSM179777     | Bcell-lowBMD-10  | postmenopause, age=56    | -                        |

| GSE13850      |                                     |                          |                          |
|---------------|-------------------------------------|--------------------------|--------------------------|
| GEO accession | Sample title                        | Sample characteristics 1 | Sample characteristics 2 |
| GSM179758     | Bcell-highBMD-1                     | postmenopause, age=57    | -                        |
| GSM179759     | Bcell-highBMD-2                     | postmenopause, age=57    | -                        |
| GSM179760     | Bcell-highBMD-3                     | postmenopause, age=60    | -                        |
| GSM179761     | Bcell-highBMD-4                     | postmenopause, age=58    | -                        |
| GSM179762     | Bcell-highBMD-5                     | postmenopause, age=54    | -                        |
| GSM179763     | Bcell-highBMD-6                     | postmenopause, age=54    | -                        |
| GSM179764     | Bcell-highBMD-7                     | postmenopause, age=58    | -                        |
| GSM179765     | Bcell-highBMD-8                     | postmenopause, age=58    | -                        |
| GSM179766     | Bcell-highBMD-9                     | postmenopause, age=55    | -                        |
| GSM179767     | Bcell-highBMD-10                    | postmenopause, age=58    | -                        |
| GSM179768     | Bcell-lowBMD-1                      | postmenopause, age=58    | -                        |
| GSM179769     | Bcell-lowBMD-2                      | postmenopause, age=56    | -                        |
| GSM179770     | Bcell-lowBMD-3                      | postmenopause, age=58    | -                        |
| GSM179771     | Bcell-lowBMD-4                      | postmenopause, age=59    | -                        |
| GSM179772     | Bcell-lowBMD-5                      | postmenopause, age=58    | -                        |
| GSM179773     | Bcell-lowBMD-6                      | postmenopause, age=60    | -                        |
| GSM179774     | Bcell-lowBMD-7                      | postmenopause, age=59    | -                        |
| GSM179775     | Bcell-lowBMD-8                      | postmenopause, age=56    | -                        |
| GSM179776     | Bcell-lowBMD-9                      | postmenopause, age=59    | -                        |
| GSM179777     | Bcell-lowBMD-10                     | postmenopause, age=56    | -                        |
| GSM348199     | B cells_Postmenopausal_Smoking_high | Postmenopause, smoking   | -                        |
|               | BMD_rep1                            |                          |                          |
| GSM348200     | B cells_Postmenopausal_Smoking_high | Postmenopause, smoking   | -                        |
|               | BMD_rep2                            |                          |                          |
| GSM348201     | B cells_Postmenopausal_Smoking_high | Postmenopause, smoking   | -                        |
|               | BMD_rep3                            |                          |                          |
| GSM348202     | B cells_Postmenopausal_Smoking_high | Postmenopause, smoking   | -                        |
|               | BMD_rep4                            |                          |                          |
| GSM348203     | B cells_Postmenopausal_Smoking_high | Postmenopause, smoking   | -                        |
|               | BMD_rep5                            |                          |                          |
| GSM348204     | B cells_Postmenopausal_Smoking_high | Postmenopause, smoking   | -                        |
|               | BMD_rep6                            |                          |                          |
| GSM348205     | B cells_Postmenopausal_Smoking_high | Postmenopause, smoking   | -                        |
|               | BMD_rep7                            |                          |                          |
| GSM348206     | B cells_Postmenopausal_Smoking_high | Postmenopause, smoking   | -                        |
|               | BMD_rep8                            |                          |                          |
| GSM348207     | B cells_Postmenopausal_Smoking_high | Postmenopause, smoking   | -                        |
|               | BMD_rep9                            |                          |                          |
| GSM348208     | B cells_Postmenopausal_Smoking_high | Postmenopause, smoking   | -                        |
|               | BMD_rep10                           |                          |                          |
| GSM348209     | B cells_Postmenopausal_Smoking_high | Postmenopause, smoking   | -                        |
|               | BMD_rep1                            |                          |                          |

|           |                                                  |                        |   |
|-----------|--------------------------------------------------|------------------------|---|
| GSM348210 | B cells_Postmenopausal_Smoking_high<br>BMD_rep2  | Postmenopause, smoking | - |
| GSM348211 | B cells_Postmenopausal_Smoking_high<br>BMD_rep3  | Postmenopause, smoking | - |
| GSM348212 | B cells_Postmenopausal_Smoking_high<br>BMD_rep4  | Postmenopause, smoking | - |
| GSM348213 | B cells_Postmenopausal_Smoking_high<br>BMD_rep5  | Postmenopause, smoking | - |
| GSM348214 | B cells_Postmenopausal_Smoking_high<br>BMD_rep6  | Postmenopause, smoking | - |
| GSM348215 | B cells_Postmenopausal_Smoking_high<br>BMD_rep7  | Postmenopause, smoking | - |
| GSM348216 | B cells_Postmenopausal_Smoking_high<br>BMD_rep8  | Postmenopause, smoking | - |
| GSM348217 | B cells_Postmenopausal_Smoking_high<br>BMD_rep9  | Postmenopause, smoking | - |
| GSM348218 | B cells_Postmenopausal_Smoking_high<br>BMD_rep10 | Postmenopause, smoking | - |

#### GSE56815

| GEO accession | Sample title                                                     | Sample characteristics 1 | Sample characteristics 2       |
|---------------|------------------------------------------------------------------|--------------------------|--------------------------------|
| GSM1369756    | Monocytes from a postmonopausal high BMD<br>woman (H-GE-01M.CEL) | gender: Female           | bone mineral density: high BMD |
| GSM1369757    | Monocytes from a postmonopausal high BMD<br>woman (H-GE-04M.CEL) | gender: Female           | bone mineral density: high BMD |
| GSM1369758    | Monocytes from a postmonopausal high BMD<br>woman (H-GE-06M.CEL) | gender: Female           | bone mineral density: high BMD |
| GSM1369759    | Monocytes from a postmonopausal high BMD<br>woman (H-GE-07M.CEL) | gender: Female           | bone mineral density: high BMD |
| GSM1369760    | Monocytes from a postmonopausal high BMD<br>woman (H-GE-10M.CEL) | gender: Female           | bone mineral density: high BMD |
| GSM1369761    | Monocytes from a postmonopausal high BMD<br>woman (H-GE-11M.CEL) | gender: Female           | bone mineral density: high BMD |
| GSM1369762    | Monocytes from a postmonopausal high BMD<br>woman (H-GE-13M.CEL) | gender: Female           | bone mineral density: high BMD |
| GSM1369765    | Monocytes from a postmonopausal high BMD<br>woman (H-GE-18M.CEL) | gender: Female           | bone mineral density: high BMD |
| GSM1369767    | Monocytes from a postmonopausal high BMD<br>woman (H-GE-20M.CEL) | gender: Female           | bone mineral density: high BMD |
| GSM1369769    | Monocytes from a postmonopausal high BMD<br>woman (H-GE-23M.CEL) | gender: Female           | bone mineral density: high BMD |
| GSM1369771    | Monocytes from a postmonopausal high BMD<br>woman (H-GE-26M.CEL) | gender: Female           | bone mineral density: high BMD |
| GSM1369777    | Monocytes from a postmonopausal high BMD<br>woman (H-GE-34M.CEL) | gender: Female           | bone mineral density: high BMD |

|            |                                                               |                |                                |
|------------|---------------------------------------------------------------|----------------|--------------------------------|
| GSM1369778 | Monocytes from a postmonopausal high BMD woman (H-GE-42M.CEL) | gender: Female | bone mineral density: high BMD |
| GSM1369779 | Monocytes from a postmonopausal high BMD woman (H-GE-45M.CEL) | gender: Female | bone mineral density: high BMD |
| GSM1369780 | Monocytes from a postmonopausal high BMD woman (H-GE-47M.CEL) | gender: Female | bone mineral density: high BMD |
| GSM1369781 | Monocytes from a postmonopausal high BMD woman (H-GE-53M.CEL) | gender: Female | bone mineral density: high BMD |
| GSM1369782 | Monocytes from a postmonopausal high BMD woman (H-GE-55M.CEL) | gender: Female | bone mineral density: high BMD |
| GSM1369783 | Monocytes from a postmonopausal high BMD woman (H-GE-59M.CEL) | gender: Female | bone mineral density: high BMD |
| GSM1369784 | Monocytes from a postmonopausal high BMD woman (H-GE-65M.CEL) | gender: Female | bone mineral density: high BMD |
| GSM1369792 | Monocytes from a postmonopausal high BMD woman (H-GE-80M.CEL) | gender: Female | bone mineral density: high BMD |
| GSM1369797 | Monocytes from a postmonopausal low BMD woman (L-GE-25M.CEL)  | gender: Female | bone mineral density: low BMD  |
| GSM1369798 | Monocytes from a postmonopausal low BMD woman (L-GE-31M.CEL)  | gender: Female | bone mineral density: low BMD  |
| GSM1369799 | Monocytes from a postmonopausal low BMD woman (L-GE-32M.CEL)  | gender: Female | bone mineral density: low BMD  |
| GSM1369800 | Monocytes from a postmonopausal low BMD woman (L-GE-35M.CEL)  | gender: Female | bone mineral density: low BMD  |
| GSM1369802 | Monocytes from a postmonopausal low BMD woman (L-GE-37M.CEL)  | gender: Female | bone mineral density: low BMD  |
| GSM1369803 | Monocytes from a postmonopausal low BMD woman (L-GE-38M.CEL)  | gender: Female | bone mineral density: low BMD  |
| GSM1369805 | Monocytes from a postmonopausal low BMD woman (L-GE-40M.CEL)  | gender: Female | bone mineral density: low BMD  |
| GSM1369807 | Monocytes from a postmonopausal low BMD woman (L-GE-43M.CEL)  | gender: Female | bone mineral density: low BMD  |
| GSM1369810 | Monocytes from a postmonopausal low BMD woman (L-GE-48M.CEL)  | gender: Female | bone mineral density: low BMD  |
| GSM1369812 | Monocytes from a postmonopausal low BMD woman (L-GE-50M.CEL)  | gender: Female | bone mineral density: low BMD  |
| GSM1369813 | Monocytes from a postmonopausal low BMD woman (L-GE-51M.CEL)  | gender: Female | bone mineral density: low BMD  |
| GSM1369814 | Monocytes from a postmonopausal low BMD woman (L-GE-52M.CEL)  | gender: Female | bone mineral density: low BMD  |
| GSM1369816 | Monocytes from a postmonopausal low BMD woman (L-GE-56M.CEL)  | gender: Female | bone mineral density: low BMD  |
| GSM1369821 | Monocytes from a postmonopausal low BMD woman (L-GE-62M.CEL)  | gender: Female | bone mineral density: low BMD  |

|            |                                                              |                |                               |
|------------|--------------------------------------------------------------|----------------|-------------------------------|
| GSM1369822 | Monocytes from a postmonopausal low BMD woman (L-GE-63M.CEL) | gender: Female | bone mineral density: low BMD |
| GSM1369823 | Monocytes from a postmonopausal low BMD woman (L-GE-64M.CEL) | gender: Female | bone mineral density: low BMD |
| GSM1369824 | Monocytes from a postmonopausal low BMD woman (L-GE-66M.CEL) | gender: Female | bone mineral density: low BMD |
| GSM1369825 | Monocytes from a postmonopausal low BMD woman (L-GE-67M.CEL) | gender: Female | bone mineral density: low BMD |
| GSM1369826 | Monocytes from a postmonopausal low BMD woman (L-GE-69M.CEL) | gender: Female | bone mineral density: low BMD |
| GSM1369828 | Monocytes from a postmonopausal low BMD woman (L-GE-72M.CEL) | gender: Female | bone mineral density: low BMD |

---

| GSE100609     |                 |                          |                          |
|---------------|-----------------|--------------------------|--------------------------|
| GEO accession | Sample title    | Sample characteristics 1 | Sample characteristics 2 |
| GSM179758     | Bcell-highBMD-1 | postmenopause, age=57    | -                        |
| GSM179759     | Bcell-highBMD-2 | postmenopause, age=57    | -                        |
| GSM179760     | Bcell-highBMD-3 | postmenopause, age=60    | -                        |
| GSM179761     | Bcell-highBMD-4 | postmenopause, age=58    | -                        |
| GSM179762     | Bcell-highBMD-5 | postmenopause, age=54    | -                        |
| GSM179763     | Bcell-highBMD-6 | postmenopause, age=54    | -                        |
| GSM179764     | Bcell-highBMD-7 | postmenopause, age=58    | -                        |
| GSM179765     | Bcell-highBMD-8 | postmenopause, age=58    | -                        |

| !Sample_geo_acc | !Sample_title    | !Sample_characteristics_ch1                                 |
|-----------------|------------------|-------------------------------------------------------------|
| GSM179758       | Bcell-highBMD-1  | postmenopause, age=57,Spine Z-score=2.28,Hip Z-score=1.46   |
| GSM179759       | Bcell-highBMD-2  | postmenopause, age=57,Spine Z-score=2.37,Hip Z-score=0.97   |
| GSM179760       | Bcell-highBMD-3  | postmenopause, age=57,Spine Z-score=1.66,Hip Z-score=1.29   |
| GSM179761       | Bcell-highBMD-4  | postmenopause, age=60,Spine Z-score=1.91,Hip Z-score=2.41   |
| GSM179762       | Bcell-highBMD-5  | postmenopause, age=58,Spine Z-score=1.23,Hip Z-score=0.80   |
| GSM179763       | Bcell-highBMD-6  | postmenopause, age=54,Spine Z-score=2.09,Hip Z-score=3.07   |
| GSM179764       | Bcell-highBMD-7  | postmenopause, age=54,Spine Z-score=2.25,Hip Z-score=2.56   |
| GSM179765       | Bcell-highBMD-8  | postmenopause, age=58,Spine Z-score=1.84,Hip Z-score=0.57   |
| GSM179766       | Bcell-highBMD-9  | postmenopause, age=55,Spine Z-score=2.74,Hip Z-score=1.19   |
| GSM179767       | Bcell-highBMD-10 | postmenopause, age=58,Spine Z-score=1.94,Hip Z-score=1.93   |
| GSM179768       | Bcell-lowBMD-1   | postmenopause, age=58,Spine Z-score=-0.9,Hip Z-score=-0.77  |
| GSM179769       | Bcell-lowBMD-2   | postmenopause, age=56,Spine Z-score=-1.62,Hip Z-score=-1.15 |
| GSM179770       | Bcell-lowBMD-3   | postmenopause, age=58,Spine Z-score=-1.3,Hip Z-score=-1.16  |
| GSM179771       | Bcell-lowBMD-4   | postmenopause, age=59,Spine Z-score=0.16,Hip Z-score=-0.9   |
| GSM179772       | Bcell-lowBMD-5   | postmenopause, age=58,Spine Z-score=-0.7,Hip Z-score=-0.47  |
| GSM179773       | Bcell-lowBMD-6   | postmenopause, age=60,Spine Z-score=-0.2,Hip Z-score=-0.88  |
| GSM179774       | Bcell-lowBMD-7   | postmenopause, age=59,Spine Z-score=-0.52,Hip Z-score=-0.89 |
| GSM179775       | Bcell-lowBMD-8   | postmenopause, age=56,Spine Z-score=0.3,Hip Z-score=-0.61   |
| GSM179776       | Bcell-lowBMD-9   | postmenopause, age=59,Spine Z-score=-2.26,Hip Z-score=-1.31 |
| GSM179777       | Bcell-lowBMD-10  | postmenopause, age=56,Spine Z-score=-0.73,Hip Z-score=-0.65 |
